# Supplementary material for: Uniformly self-decorated Co3O4 nanoparticles on N, S co-doped carbon layers derived from a camphor sulfonic acid and metal–organic framework hybrid as an oxygen evolution electrocatalyst
Source: Royal Society of Chemistry journal article supplement (doi:10.1039/c8ta02926a), 2018-01-01
Supplement: c8ta02926a1.pdf [file c8ta02926a1.pdf]

**Supporting information**

**Uniformly self-decorated Co<sub>3</sub>O<sub>4</sub> nanoparticles onto N, S co-doped carbon layers derived from camphor sulfonic acid and metal organic framework hybrids for oxygen evolution electrocatalyst**

**Mohd. Khalid,<sup>1,\*</sup> Ana M.B. Honorato,<sup>2</sup> Edson A. Ticianelli,<sup>1</sup> Hamilton Varela<sup>1,\*</sup>**

<sup>1</sup> Institute of Chemistry of São Carlos, University of São Paulo, POBox 780, 13560-970, São Carlos, SP, Brazil.

<sup>2</sup> Center of Advanced Science and Engineering for Carbon (Case4carbon), Department of Macromolecular Science and Engineering, Case Western Reserve University, 10900 Euclid Avenue, Cleveland, OH 44106, USA.

\*Corresponding authors email addresses: [mkansarister@gmail.com](mailto:mkansarister@gmail.com) (MK),  
[hamiltonvarela@usp.br](mailto:hamiltonvarela@usp.br) (HV)

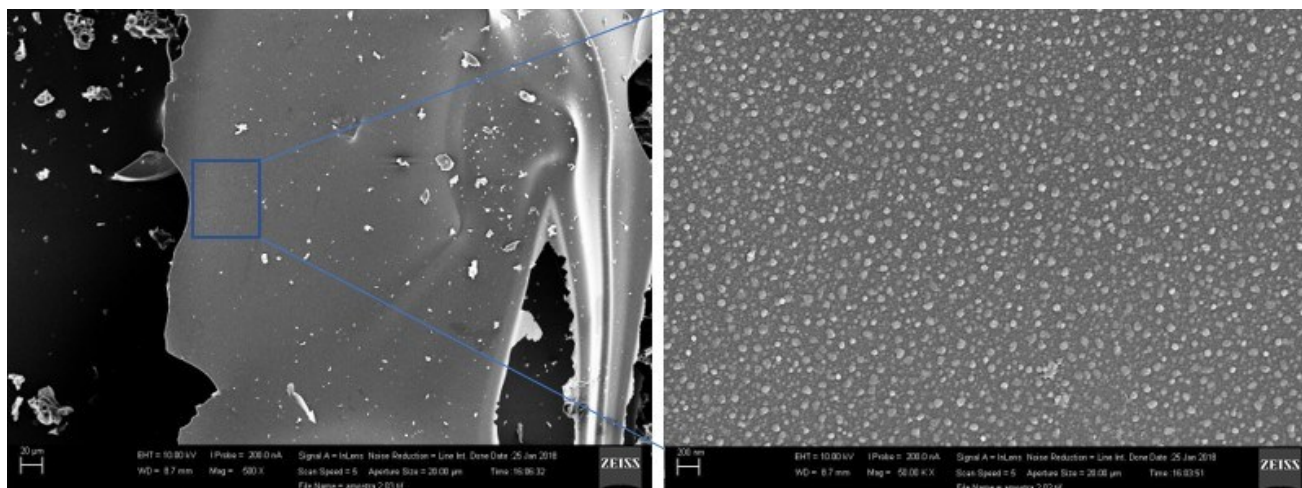

Fig. 1S SEM images of acid treated  $\text{Co}_3\text{O}_4/\text{NSC}$ .

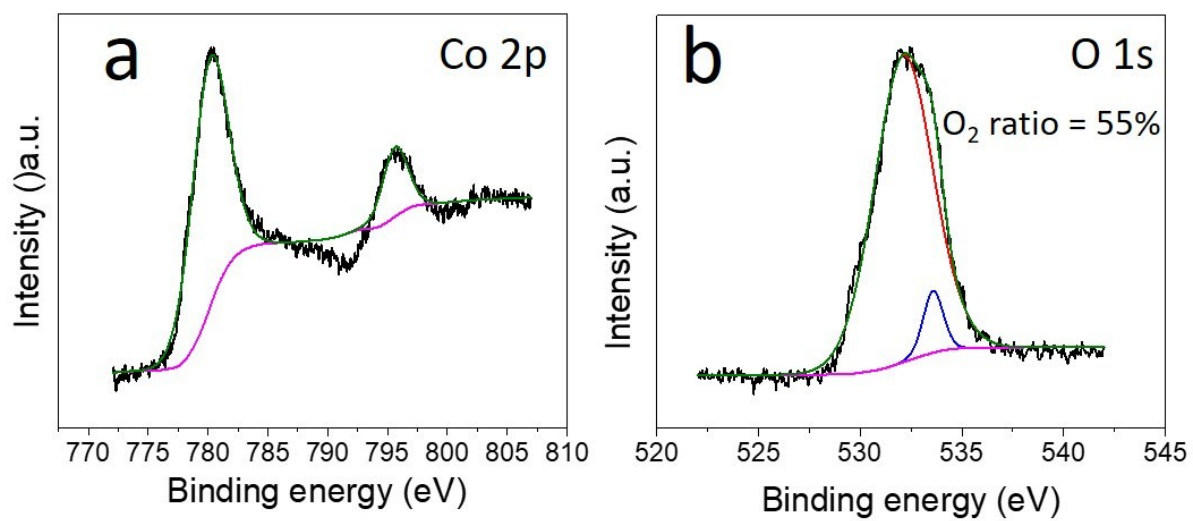

Fig. 2S a) XPS spectra of  $\text{Co}2p$  of pyrolyzed ZIF-67 and b) HR-XPS of  $\text{O}1s$  of pyrolyzed ZIF-67.

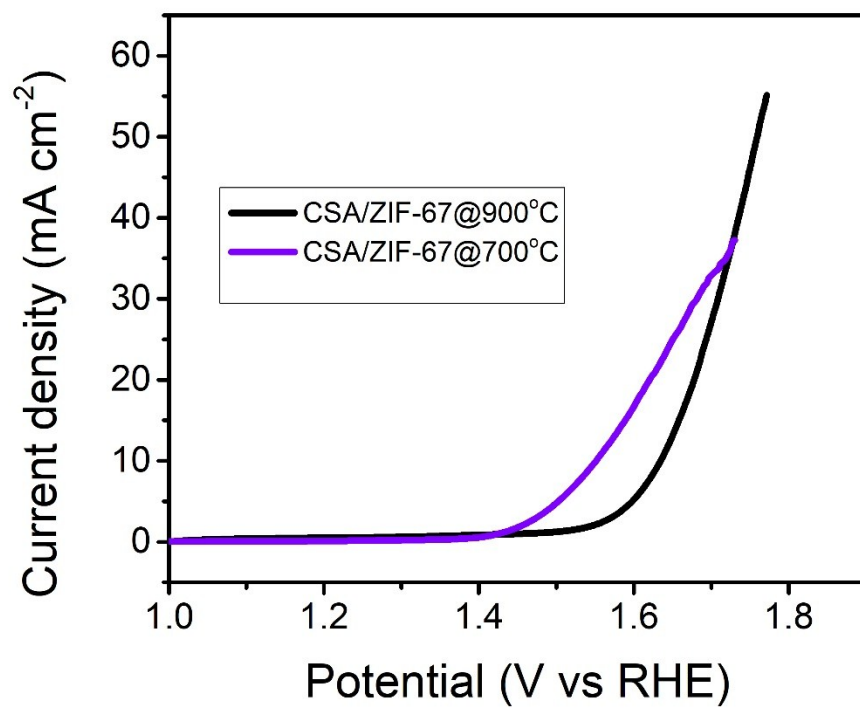

Fig. 3S LSV curves of CSA/ZIF-67 at different pyrolytic temperature.

### Additional supporting figures

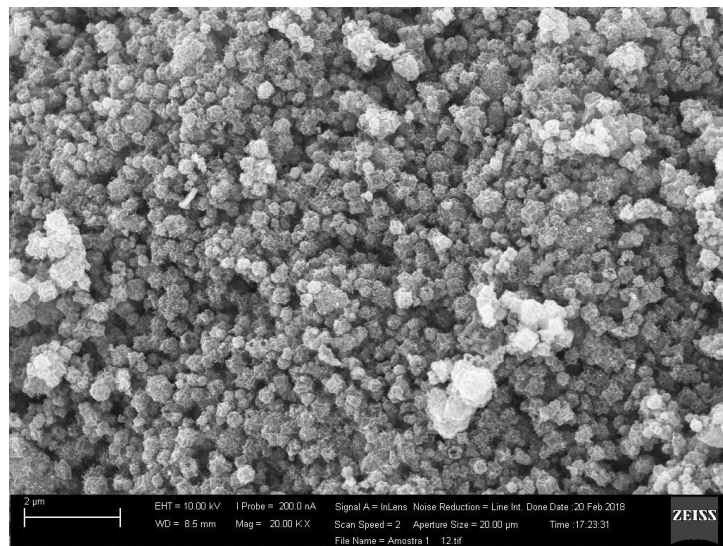

Fig. 4S SEM image of pyrolyzed ZIF-67.

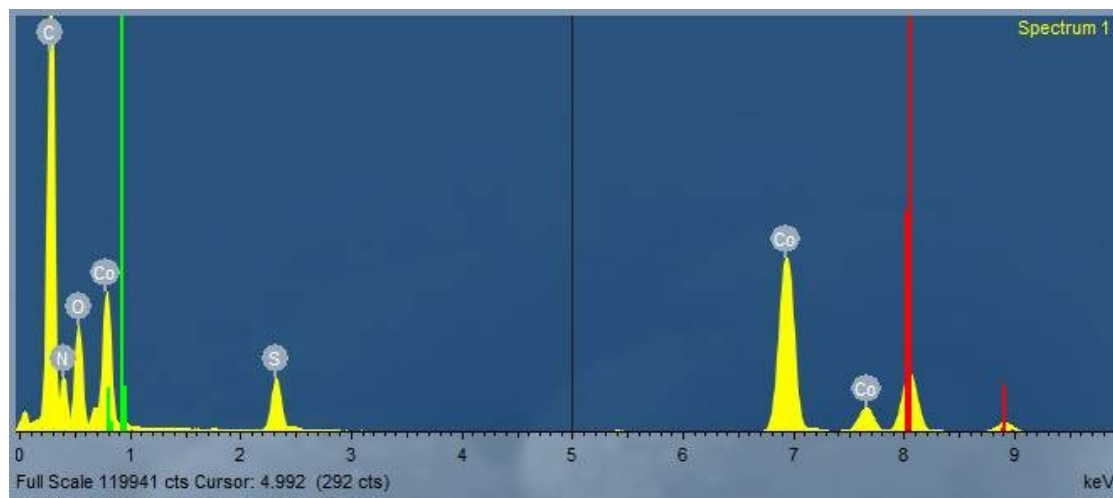

Fig. 5S Energy-dispersive X-ray spectroscopy of  $\text{Co}_3\text{O}_4/\text{NSC}$ . The data reveals that the material contains C, N, O, S, and Co as the main components.
